# Supplementary material for: Characterization of weaning-induced breast involution in women: implications for young women’s breast cancer
Source: PubMed Central journal article supplement (PMC7568540; doi:10.1038/s41523-020-00196-3), 2020-10-16
Supplement: 41523_2020_196_MOESM1_ESM.pdf [file 41523_2020_196_MOESM1_ESM.pdf]

# Supplementary Figure 1

## A. Lobular composition vs. Length of exclusive nursing

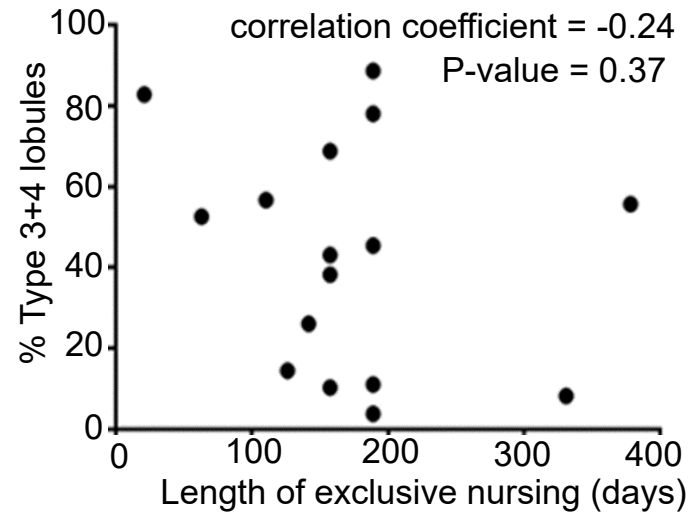

Length of exclusive nursing  
Average = 171.6 days (SD  $\pm$ 86.2),  
Median = 157.5 days,  
Range = 21-378 days

Type 3+4 lobule %  
Average = 42.8%,  
Median = 44.3%

## B. Lobular composition vs. Total lactation time

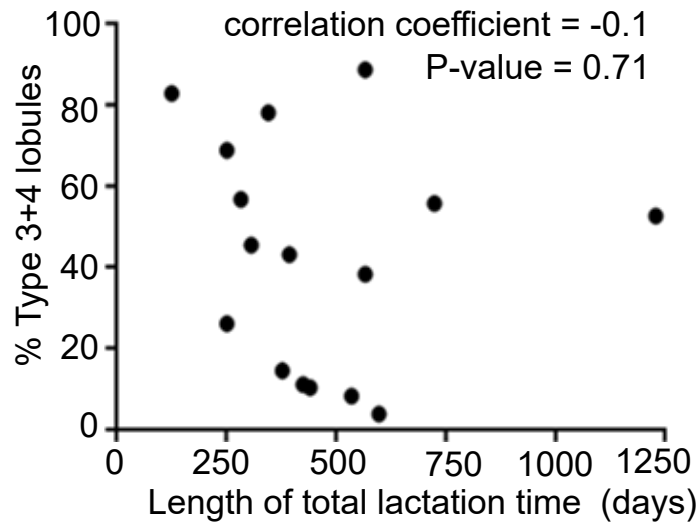

Total lactation time  
Average = 464.1 days (SD  $\pm$ 256.4),  
Median = 409.5 days,  
Range = 126-1228.5 days

Type 3+4 lobule %  
Average = 42.8%,  
Median = 44.3%

## C. Lobular composition vs. Number of births

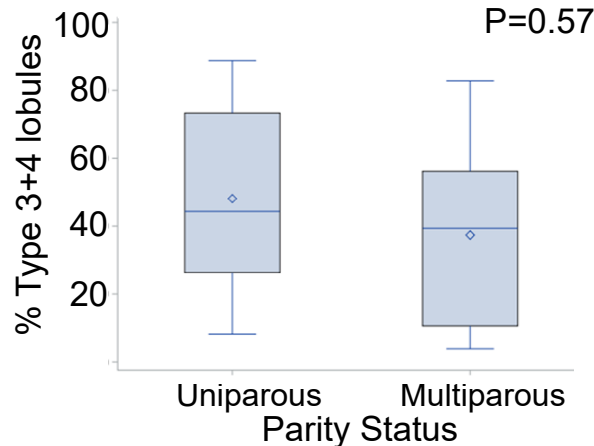

| Number of Births | % Type 3+4 lobules |          |      |        |      |
|------------------|--------------------|----------|------|--------|------|
|                  | Mean               | Std. Dev | Min. | Median | Max. |
| Uniparous        | 48.1               | 28.8     | 8.3  | 44.3   | 88.7 |
| Multiparous      | 37.4               | 28.5     | 3.8  | 39.4   | 82.8 |

**Supplementary Table 1:**

| Stain     | Antigen                         | Species | Vendor                    | Clone         | Catalog #  | Protein Block (10 min RT)                | Concentration    | Secondary Antibody                                | Concentration           |
|-----------|---------------------------------|---------|---------------------------|---------------|------------|------------------------------------------|------------------|---------------------------------------------------|-------------------------|
| Multiplex | Adipophilin                     | Ms      | Lifespan Biosciences      | AP125         | LS-C348703 | 5% normal goat serum, 2.5% BSA in 1X PBS | 1:300, 1hr RT    | Histofine anti Ms (414134F)                       | ready-to-use, 30 min RT |
| Multiplex | Beta casein                     | Ms      | Novus Biologicals         | F20.14        | NB100-2720 | 5% normal goat serum, 2.5% BSA in 1X PBS | 1:200, 1hr RT    | Histofine anti Ms (414134F)                       | ready-to-use, 30 min RT |
| Multiplex | CD45 (Leukocyte Common Antigen) | Ms      | Dako                      | 2B11 + PD7/26 | M0701      | 5% normal goat serum, 2.5% BSA in 1X PBS | 1:200, 1hr RT    | Histofine anti Ms (414134F)                       | ready-to-use, 30 min RT |
| Multiplex | Podoplanin                      | Ms      | Dako                      | D2-40         | M3619      | 5% normal goat serum, 2.5% BSA in 1X PBS | 1:50, 1hr RT     | Histofine anti Ms (414134F)                       | ready-to-use, 30 min RT |
| Multiplex | E-cadherin                      | Rb      | Cell Signaling Technology | 24E10         | 3195       | 5% normal goat serum, 2.5% BSA in 1X PBS | 1:100, 1hr RT    | Histofine anti Rb (414144F)                       | ready-to-use, 30 min RT |
| Dual      | SMA                             | Ms      | Dako                      | 1A4           | M0851      | Biocare Background Sniper #CB917         | 1:1000, 1hr RT   | DAKO Envision+HRP anti Ms (K4001)                 | ready-to-use, 30 min RT |
| Dual      | Cytokeratin 18 (CK18)           | Rb      | abcam                     | EPR17347      | ab181597   | Biocare Background Sniper #CB917         | 1:5000, 1hr RT   | PolyviewPlus AP Polymer anti Rb (ENZ-ACC110-0150) | ready-to-use, 30 min RT |
| Dual      | COX-2                           | Rb      | Thermo Scientific         | SP21          | RM-9121    | Biocare Background Sniper #CB917         | 1:150, 1hr RT    | PolyviewPlus AP Polymer anti Rb (ENZ-ACC110-0150) | ready-to-use, 30 min RT |
| Dual      | COX-2                           | Ms      | Cayman Chemical           | CX229         | 160112     | Biocare Background Sniper #CB917         | 1:250, 1.5 hr RT | DAKO Envision+HRP anti Ms (K4001)                 | ready-to-use, 30 min RT |
